# Supplementary material for: Innate lymphoid cells and COVID-19 severity in SARS-CoV-2 infection
Source: eLife. 2022 Mar 11;11:e74681. doi: 10.7554/eLife.74681 (PMC9038195; doi:10.7554/eLife.74681)
Supplement: Figure 2—source data 1. — Data included in this file are associated with Figures 1—3; Figure 3—figure supplement 1; Figure 6; Tables 1–4; and Supplementary file 2d,e . File name: Adult_COVIDandControl_data.xlsx. [file elife-74681-fig2-data1.xlsx]

## Sheet: Sheet1
SampleID	Age	Sex	Group	SymptomDurationAtSampleCollection	ICUadmit(1=yes)	Intubated(1=yes)	Mortality(1=yes)	Diabetes(1=1)	DaysHospitalized	max_crp_value	max_esr_value	max_d_dimer_value	CD4perMillionLymphocytes	CD8perMillionLymphocytes	ILCperMillionLymphocytes	CD16posNKcellperMillionLymphocytes	ILCPperMillionLymphocytes	LymphocytesPerMillionPBMCs	CD4perMillionPBMCs	CD8perMillionPBMCs	ILCperMillionPBMCs	CD16posNKcellperMillionPBMCs	%AREG+ILCs
Outpatient_1	49	Female	Outpatient	3	0	0	0	0	NA	NA	NA	NA	570813	NA	5931.53	NA	1257.12	359424	205164	NA	2131.93	NA	32.1
Outpatient_2	35	Female	Outpatient	34	0	0	0	0	NA	NA	NA	NA	450331	252908	1317.52	61095.7	504.426	532326	239723	170830	701.349	41267.8	14.5
Outpatient_3	30	Male	Outpatient	22	0	0	0	0	NA	NA	NA	NA	439817	285226	1319.98	126086	466.333	626685	275626	204983	827.214	90613.9	14
Outpatient_4	32	Female	Outpatient	44	0	0	0	0	NA	NA	NA	NA	596671	196352	1583.41	58430.3	630	687918	410461	142710	1089.25	42467.4	10.3
Outpatient_5	57	Female	Outpatient	5	0	0	0	1	NA	NA	NA	NA	575656	143055	309.16	131269	560.198	704656	405639	126831	217.851	116382	4.19
Outpatient_6	29	Male	Outpatient	30	0	0	0	0	NA	NA	NA	NA	435919	344455	957.864	12861.4	413.526	680863	296801	270934	652.174	10116.3	12
Outpatient_7	77	Male	Outpatient	37	0	0	0	NA	NA	NA	NA	NA	495502	93321.2	349.51	146093	149.104	472336	234043	53996.6	165.086	84531.2	3.65
Outpatient_8	58	Male	Outpatient	34	0	0	0	0	NA	NA	NA	NA	404330	177963	3651.56	61240.3	1475.39	539664	218202	125959	1970.61	43345	15.3
Outpatient_9	34	Female	Outpatient	17	0	0	0	0	NA	NA	NA	NA	504082	152303	1874.19	118167	590.123	747453	376778	125765	1400.87	97577.7	14
Outpatient_10	30	Female	Outpatient	19	0	0	0	0	NA	NA	NA	NA	420802	237780	1545.93	60759.8	500.984	445668	187538	197406	688.971	50443	4.19
Outpatient_11	50	Female	Outpatient	3	0	0	0	0	NA	NA	NA	NA	416304	418529	330.09	22244.7	72.7199	481506	200453	253782	158.94	13488.4	3
Outpatient_12	27	Female	Outpatient	54	0	0	0	0	NA	NA	NA	NA	635352	200218	1595.63	22341.7	463.063	680575	432405	167010	1085.95	18636.1	8.39
Outpatient_13	30	Female	Outpatient	32	0	0	0	0	NA	NA	NA	NA	652531	159517	489.275	90418.2	117.67	818505	534100	142747	400.474	80912.5	4.73
Outpatient_14	28	Female	Outpatient	34	0	0	0	NA	NA	NA	NA	NA	602258	143759	1257.94	101484	873.535	728974	439030	111062	917.004	78402.3	4.42
Outpatient_15	35	Male	Outpatient	42	0	0	0	0	NA	NA	NA	NA	579346	178848	1123.48	111178	311.431	654075	378935	133561	734.838	83026.2	4.61
Outpatient_16	30	Female	Outpatient	26	0	0	0	0	NA	NA	NA	NA	636778	169349	1713.11	92486.1	515.617	761990	485218	137462	1305.38	75071.7	8.78
Outpatient_17	33	Male	Outpatient	23	0	0	0	0	NA	NA	NA	NA	30756.4	8496.38	623.441	701.536	0	112804	3469.45	3805.33	70.3268	314.202	NA
Outpatient_18	31	Female	Outpatient	28	0	0	0	0	NA	NA	NA	NA	673783	139401	762.291	78675	216.659	659830	444583	107380	502.983	60603.3	5.71
Outpatient_19	24	Female	Outpatient	31	0	0	0	0	NA	NA	NA	NA	503833	252818	1611.36	70407.4	124.261	672195	338674	179578	1083.15	50010.7	17.2
Outpatient_20	34	Female	Outpatient	NA	0	0	0	0	NA	NA	NA	NA	591841	183596	1062.36	87924	194.337	506441	299733	133566	538.023	63964.6	19.9
Outpatient_21	32	Male	Outpatient	37	0	0	0	0	NA	NA	NA	NA	465528	245962	1097.11	118090	629.654	708039	329612	180911	776.8	86858.2	9.38
Outpatient_22	34	Female	Outpatient	38	0	0	0	0	NA	NA	NA	NA	471960	188213	2565.18	79277.7	908.044	690499	325888	139661	1771.26	58827.2	7.85
Outpatient_23	55	Female	Outpatient	27	0	0	0	0	NA	NA	NA	NA	494128	87498.1	2043.74	90551.9	468.59	443895	219341	75185.2	907.208	77809.2	4.26
Outpatient_24	23	Male	Outpatient	8	0	0	0	0	NA	NA	NA	NA	356438	139181	2802.43	117661	705.219	429611	153129	116717	1203.95	98670.4	5.74
Outpatient_25	45	Male	Outpatient	32	0	0	0	0	NA	NA	NA	NA	424700	163189	1113.47	190060	485.412	637710	270835	120703	710.074	140578	8
Outpatient_26	42	Female	Outpatient	41	0	0	0	0	NA	NA	NA	NA	589837	199171	1065.54	65452.4	426.196	506885	298979	154401	540.107	50739.9	6.17
Outpatient_27	66	Female	Outpatient	50	0	0	0	0	NA	NA	NA	NA	364577	381002	899.878	69800.4	364.709	609967	222380	300596	548.896	55069.8	11
Outpatient_28	35	Female	Outpatient	42	0	0	0	0	NA	NA	NA	NA	449931	215224	1854.7	86908.3	614.809	672007	302357	161255	1246.37	65115.5	6.98
Outpatient_29	40	Female	Outpatient	14	0	0	0	0	NA	NA	NA	NA	566393	200538	971.592	89992.4	311.584	684774	387851	147706	665.321	66283.6	4.59
Outpatient_30	31	Female	Outpatient	13	0	0	0	0	NA	NA	NA	NA	560127	159818	2030.16	81792.2	888.688	687561	385122	126017	1395.86	64493.5	10.6
Outpatient_31	26	Male	Outpatient	13	0	0	0	NA	NA	NA	NA	NA	495794	180767	2768.05	147793	994.025	741450	367606	150953	2052.37	123417	6.78
Outpatient_32	26	Female	Outpatient	28	0	0	0	0	NA	NA	NA	NA	517952	227866	1781.25	65267.2	941.403	696463	360734	182940	1240.57	52399.1	17.8
Outpatient_33	61	Female	Outpatient	9	0	0	0	NA	NA	NA	NA	NA	539893	205720	679.225	37473.1	601.728	445404	240470	131652	302.529	23981.2	11.2
Outpatient_34	37	Female	Outpatient	38	0	0	0	0	NA	NA	NA	NA	481049	236053	424.528	129164	287.82	717826	345309	183672	304.737	100502	9.75
Outpatient_35	31	Female	Outpatient	36	0	0	0	0	NA	NA	NA	NA	493263	271352	1289.8	68397.2	421.61	803279	396228	224768	1036.07	56655.2	10.3
Outpatient_36	52	Female	Outpatient	27	0	0	0	0	NA	NA	NA	NA	292490	222934	387.404	74044.4	210.841	480648	140585	156137	186.205	51858.9	4.55
Outpatient_37	33	Female	Outpatient	1	0	0	0	0	NA	NA	NA	NA	486989	163918	1610.11	21173.3	996.873	530044	258126	141791	853.43	18315.2	5.66
Outpatient_38	25	Female	Outpatient	26	0	0	0	0	NA	NA	NA	NA	462770	177048	1232.74	202885	747.275	750602	347357	140236	925.301	160701	9.1
Outpatient_39	28	Male	Outpatient	11	0	0	0	0	NA	NA	NA	NA	361413	249334	2276.73	18137.2	1237.01	441731	159647	156810	1005.7	11406.7	2.93
Outpatient_40	30	Female	Outpatient	4	0	0	0	0	NA	NA	NA	NA	576411	105978	3025.27	10394	853.755	364175	209915	66377.2	1101.73	6510.1	7.74
Outpatient_41	34	Male	Outpatient	31	0	0	0	0	NA	NA	NA	NA	592719	245307	695.199	34877.5	114.658	707048	419081	190938	491.54	27147.4	15.4
Outpatient_42	27	Female	Outpatient	25	0	0	0	0	NA	NA	NA	NA	469968	293905	1025.63	99477.5	256.314	710644	333980	223978	728.856	75809.5	3.6
Outpatient_43	32	Female	Outpatient	32	0	0	0	0	NA	NA	NA	NA	547019	251664	829.938	41204	274.125	689514	377177	188960	572.254	30937.7	10
Outpatient_44	59	Female	Outpatient	39	0	0	0	0	NA	NA	NA	NA	496635	178898	430.993	123544	170.978	694928	345126	140261	299.509	96862.3	8.92
Outpatient_45	28	Female	Outpatient	29	0	0	0	0	NA	NA	NA	NA	499435	180607	3040.67	182179	1841.34	808511	403799	149277	2458.41	150577	28.7
Outpatient_46	31	Female	Outpatient	61	0	0	0	0	NA	NA	NA	NA	434115	222341	2673.88	127945	1112.45	602354	261491	166590	1610.62	95863.3	12.7
Outpatient_47	31	Male	Outpatient	27	0	0	0	NA	NA	NA	NA	NA	580285	81426.3	1890.82	101122	972.856	692440	401813	65518.1	1309.28	81366.1	22.8
Outpatient_48	27	Female	Outpatient	11	0	0	0	0	NA	NA	NA	NA	505000	231062	2817.09	69618.6	1339.28	793154	400543	196823	2234.39	59302.3	27.8
Outpatient_49	29	Female	Outpatient	20	0	0	0	0	NA	NA	NA	NA	367187	287534	1421.2	121255	530.466	658656	241849	216302	936.082	91216	19.8
Outpatient_50	53	Female	Outpatient	26	0	0	0	0	NA	NA	NA	NA	590522	246787	1202.73	58001.7	239.819	779635	460392	210690	937.69	49517.9	10.7
Outpatient_51	23	Female	Outpatient	31	0	0	0	NA	NA	NA	NA	NA	538545	185525	2334.61	56117.2	677.161	692125	372741	141353	1615.84	42756	13.4
Hospitalized_1	83	Male	Hospitalized	10	1	1	0	0	24	296.5	138	10000	308782	140622	348.804	292551	140.185	488442	150822	72715.8	170.37	151279	3.54
Hospitalized_2	57	Male	Hospitalized	17	1	1	1	0	NA	297.9	90	5098	107461	117176	294.616	17268.6	104.739	311335	33456.4	22376.2	91.7242	3297.65	5.03
Hospitalized_3	66	Male	Hospitalized	57	1	1	0	1	76	300	135	10000	116070	348321	264.311	150104	0	208437	24193.3	98082	55.0921	42267.1	4.96
Hospitalized_4	35	Female	Hospitalized	11	1	1	0	1	44	286.3	73	5729	600451	146192	1097.23	65203.9	503.853	579771	348124	109972	636.143	49049.5	7.34
Hospitalized_5	46	Male	Hospitalized	32	1	1	1	0	NA	539.5	92	7249	334349	253864	34.6368	92602.9	107.98	174013	58181.1	91327.2	6.02726	33313.8	2.14
Hospitalized_6	79	Female	Hospitalized	11	0	0	0	0	4	232.1	111	812	336233	157314	281.159	189470	30.7882	611662	205661	114289	171.974	137651	5.56
Hospitalized_7	81	Male	Hospitalized	36	1	1	0	0	49	299.5	124	3755	474729	202074	47.8171	104056	0	185685	88150.2	67434.7	8.87894	34724.8	23.3
Hospitalized_8	53	Male	Hospitalized	19	1	1	0	1	64	320	134	8506	192270	71578	46.9065	33372.1	0	162781	31298	22754.3	7.63551	10608.8	16.4
Hospitalized_9	81	Male	Hospitalized	12	1	1	0	0	41	132.2	99	10000	130152	119731	118.668	205534	0	359982	46852.4	35005.8	42.7182	60092.1	2.11
Hospitalized_10	44	Male	Hospitalized	11	1	1	0	0	58	253.3	139	6382	283552	269168	291.584	58205.5	115.855	257795	73098.4	94398	75.169	20412.9	12.1
Hospitalized_11	60	Male	Hospitalized	7	1	1	0	0	48	150	51	5789	306564	170470	847.252	48655.1	53.3295	238662	73165.2	56037.3	202.207	15994	3.13
Hospitalized_12	41	Female	Hospitalized	9	1	1	0	0	54	65	NA	8995	315236	160477	777.699	30375	0	529440	166898	117401	411.745	22221.6	4.89
Hospitalized_13	33	Female	Hospitalized	20	1	1	0	0	35	343	146	7680	563104	240318	679.443	49126.4	26.799	508684	286442	157089	345.622	32112.5	7.28
Hospitalized_14	65	Male	Hospitalized	27	1	1	1	1	NA	68.3	64	6510	251167	92559.9	340.611	62295.8	40.6636	267199	67111.4	20130.2	91.0109	13548.3	6.02
Hospitalized_15	54	Male	Hospitalized	21	1	1	0	1	39	200.4	116	3013	262506	41276.7	111.657	71211.7	0	157640	41381.4	11060.4	17.6016	19081.6	2.88
Hospitalized_16	66	Female	Hospitalized	11	1	1	0	0	37	132.1	142	2794	342217	445246	504.994	2538.62	423.685	299293	102423	161545	151.141	921.067	13.6
Hospitalized_17	43	Female	Hospitalized	25	1	1	0	0	53	297.1	49	10000	81810.5	159307	76.3259	39538	0	309701	25336.8	16786.3	23.6382	4166.16	18.2
Hospitalized_18	67	Female	Hospitalized	16	0	0	0	0	5	68.7	30	1970	631696	116953	604.112	109557	272.228	501065	316521	89704.4	302.699	84031.1	3.05
Hospitalized_19	43	Female	Hospitalized	48	1	1	0	0	43	275.8	16	11923	402141	200229	764.792	13442.9	295.491	343828	138267	119708	262.957	8036.96	9.82
Hospitalized_20	69	Female	Hospitalized	18	1	0	0	1	6	123.7	91	1108	598641	170243	466.128	43213.8	101.325	452232	270725	95665.9	210.798	24283.5	11
Hospitalized_21	63	Female	Hospitalized	NA	1	1	0	1	87	338.4	127	8848	426179	305620	478.518	71907.1	85.6992	362852	154640	154640	173.631	36384.2	4.15
Hospitalized_22	55	Male	Hospitalized	16	0	0	0	0	5	49	27	1549	263711	182296	575.951	199633	35.197	445172	117397	107332	256.398	117539	2.74
Hospitalized_23	51	Male	Hospitalized	26	1	1	0	1	44	355.8	136	9024	529829	150135	215.142	47280.7	57.4429	515390	273069	88840.5	110.882	27977.7	3.27
Hospitalized_24	47	Male	Hospitalized	66	1	1	0	0	NA	360.3	135	6895	376706	465038	443.245	74373.4	50.5996	494775	186385	166053	219.307	26556.8	3.11
Hospitalized_25	70	Male	Hospitalized	12	1	1	1	0	NA	338.4	21	3863	528866	78032.6	311.648	30176.6	47.2836	423018	223720	44166.7	131.833	17080	1.91
Hospitalized_26	60	Female	Hospitalized	54	1	1	1	0	NA	253.9	88	9733	289740	140433	295.529	65656.2	133.844	356444	103276	75732.4	105.339	35406.8	5.02
Hospitalized_27	27	Female	Hospitalized	58	1	1	0	0	59	184	89	7127	531988	214945	1534.66	63347	944.207	480211	255466	146606	736.961	43206.5	19.1
Hospitalized_28	79	Male	Hospitalized	14	1	1	1	0	NA	312.3	134	6421	416468	222308	172.181	111381	37.6889	449383	187154	123144	77.375	61697.5	6.75
Hospitalized_29	56	Male	Hospitalized	17	0	0	0	0	7	158	68	829	183994	229454	1162.68	324804	197.628	283085	52085.9	121819	329.137	172441	0.67
Hospitalized_30	66	Male	Hospitalized	12	1	1	0	1	17	253.4	62	1922	568962	137308	425.297	52092	83.2952	329822	187656	81825.4	140.272	31042.9	0.85
Hospitalized_31	70	Male	Hospitalized	20	1	1	0	0	11	135.2	30	1965	363333	278749	618.893	151742	367.706	473829	172158	175965	293.249	95789.5	12.7
Hospitalized_32	60	Male	Hospitalized	5	1	1	0	0	30	259.7	125	5666	389256	343117	550.716	39334.1	121.729	342731	133410	162924	188.747	18677.2	17.4
Hospitalized_33	57	Male	Hospitalized	23	1	1	0	0	15	270	46	3641	354668	335599	916.679	43261.8	142.388	395000	140094	222611	362.088	28696.5	30
Hospitalized_34	53	Female	Hospitalized	16	0	0	0	0	4	25	28	351	309541	203045	996.403	135636	886.839	442542	136985	143942	440.95	96154.6	9.55
Hospitalized_35	70	Female	Hospitalized	17	1	1	0	1	39	279.3	NA	10000	167556	469327	172.147	17920.1	54.5971	246320	41272.4	165289	42.4031	6311.14	7.56
Hospitalized_36	24	Female	Hospitalized	13	0	0	0	0	6	42.4	38	613	513686	245295	2366.94	38125.7	1222.59	608299	312475	195945	1439.81	30455.3	4.35
Hospitalized_37	63	Male	Hospitalized	25	1	1	0	0	46	328.8	141	10000	247350	284724	181.528	52197.2	0	243757	60293.1	97033.8	44.2486	17788.8	3.05
Hospitalized_38	76	Male	Hospitalized	14	1	1	1	0	NA	227.4	93	5687	272238	105370	796.892	53021.6	474.721	166088	45215.4	27351.8	132.354	13763.3	4.9
Hospitalized_39	60	Male	Hospitalized	11	1	1	0	1	40	283.1	140	5530	347784	180617	518.6	19648.2	127.817	242696	84405.7	73568.8	125.862	8003.12	6.02
Hospitalized_40	31	Female	Hospitalized	12	0	0	0	0	5	6.5	15	1023	657269	141470	1054.76	44214.1	531.968	556765	365944	117447	587.253	36706.2	14.9
Control_1	31	Female	Control	NA	NA	NA	NA	NA	NA	NA	NA	NA	698000	156245	1749.71	18766.5	411.531	694432	484713	123445	1215.05	14827	13.7
Control_2	29	Male	Control	NA	NA	NA	NA	NA	NA	NA	NA	NA	370988	243579	2042.5	107545	590.947	511268	189674	160010	1044.27	70647.6	9.3
Control_3	23	Male	Control	NA	NA	NA	NA	NA	NA	NA	NA	NA	283583	245331	1829.01	142447	1005.71	485381	137646	154482	887.768	89697.5	8.12
Control_4	23	Female	Control	NA	NA	NA	NA	NA	NA	NA	NA	NA	339217	328226	1695.45	110678	532.225	741989	251695	268165	1258	90425.4	15.3
Control_5	24	Male	Control	NA	NA	NA	NA	NA	NA	NA	NA	NA	472337	215204	2180.4	95065.6	984.904	583633	275672	146558	1272.55	64741.6	24
Control_6	23	Male	Control	NA	NA	NA	NA	NA	NA	NA	NA	NA	402891	191829	1149.45	122847	549.555	669335	269669	140219	769.366	89795.8	6.58
Control_7	24	Female	Control	NA	NA	NA	NA	NA	NA	NA	NA	NA	664586	68457	2959.45	59434	800.386	632595	420414	53795.7	1872.14	46705.1	16.6
Control_8	63	Female	Control	NA	NA	NA	NA	NA	NA	NA	NA	NA	484749	137657	1242.82	208220	929.098	608974	295200	92447.7	756.844	139836	4.91
Control_9	27	Female	Control	NA	NA	NA	NA	NA	NA	NA	NA	NA	440087	217782	1205.84	105698	256.431	588415	258953	142798	709.534	69305.9	10.9
Control_10	44	Female	Control	NA	NA	NA	NA	NA	NA	NA	NA	NA	584393	154065	2266.19	66865.9	581.44	717728	419435	121117	1626.51	52566.3	12.1
Control_11	33	Female	Control	NA	NA	NA	NA	NA	NA	NA	NA	NA	586351	186083	2615.61	38806.2	931.718	806164	472695	153769	2108.61	32067.4	26.3
Control_12	36	Female	Control	NA	NA	NA	NA	NA	NA	NA	NA	NA	600630	188328	1887.05	36334.2	613.351	628671	377598	137645	1186.34	26555.8	9.35
Control_13	30	Female	Control	NA	NA	NA	NA	NA	NA	NA	NA	NA	367941	300671	2441.77	123980	908.52	422581	155485	149120	1031.85	61488.7	41.8
Control_14	24	Female	Control	NA	NA	NA	NA	NA	NA	NA	NA	NA	483696	207159	1503.94	28208.9	482.12	609097	294618	152547	916.045	20772.3	15
Control_15	24	Female	Control	NA	NA	NA	NA	NA	NA	NA	NA	NA	599277	207249	2264.33	47693.5	958.879	814759	488267	179705	1844.88	41354.8	31.8
Control_16	50	Female	Control	NA	NA	NA	NA	NA	NA	NA	NA	NA	444793	344765	714.922	68486.9	478.814	700468	311563	256985	500.78	51049.5	13.9
Control_17	23	Female	Control	NA	NA	NA	NA	NA	NA	NA	NA	NA	606899	238986	1214.54	26765.1	572.093	673788	408921	191724	818.345	21472	30
Control_18	25	Male	Control	NA	NA	NA	NA	NA	NA	NA	NA	NA	390192	260706	2848.24	81209.2	1593.01	452727	176651	158742	1289.47	49447.8	15.4
Control_19	48	Male	Control	NA	NA	NA	NA	NA	NA	NA	NA	NA	537663	262704	332.004	100454	315.534	645432	347025	190100	214.286	72690.9	26.3
Control_20	63	Female	Control	NA	NA	NA	NA	NA	NA	NA	NA	NA	701932	89647.3	503.118	110300	248.005	671092	471061	68349.9	337.638	84095.8	5.63
Control_21	40	Male	Control	NA	NA	NA	NA	NA	NA	NA	NA	NA	438425	240555	1259.12	107161	811.436	610717	267753	168389	768.966	75012.9	9.86
Control_22	28	Male	Control	NA	NA	NA	NA	NA	NA	NA	NA	NA	557835	196104	1273.81	53995.1	728.193	587455	327703	133050	748.305	36634	11.4
Control_23	28	Female	Control	NA	NA	NA	NA	NA	NA	NA	NA	NA	563462	264906	1856.45	36291.4	400.463	654459	368763	205130	1214.97	28102.3	19.7
Control_24	25	Female	Control	NA	NA	NA	NA	NA	NA	NA	NA	NA	495560	216455	2782.61	77352.4	1308.41	678689	336331	174130	1888.52	62227	24.6
Control_25	64	Male	Control	NA	NA	NA	NA	NA	NA	NA	NA	NA	531254	155765	1277.25	93746.5	783.838	511171	271562	87391.8	652.893	52596.3	20.3
Control_26	30	Female	Control	NA	NA	NA	NA	NA	NA	NA	NA	NA	481769	311826	951.327	27875.2	614.254	701537	337979	246769	667.391	22059.4	12.6
Control_27	55	Female	Control	NA	NA	NA	NA	NA	NA	NA	NA	NA	258190	151260	2261.39	169172	360.301	338924	87506.7	70547.4	926.443	78901.8	NA
Control_28	67	Male	Control	NA	NA	NA	NA	NA	NA	NA	NA	NA	164096	333821	959.68	113105	335.904	511963	84011.1	186141	502.722	63067.9	NA
Control_29	59	Female	Control	NA	NA	NA	NA	NA	NA	NA	NA	NA	175942	152412	3607.99	204160	1342.68	318522	56041.5	63777.2	1415.65	85431.2	NA
Control_30	67	Female	Control	NA	NA	NA	NA	NA	NA	NA	NA	NA	232285	223318	1413.5	145979	687.091	463473	107658	119253	736.334	77954.1	NA
Control_31	50	Male	Control	NA	NA	NA	NA	NA	NA	NA	NA	NA	353630	81725.2	1382.43	114414	458.353	427919	151325	44390.7	704.545	62146.2	NA
Control_32	48	Male	Control	NA	NA	NA	NA	NA	NA	NA	NA	NA	NA	NA	1933.73	NA	624.563	NA	NA	NA	750.003	NA	NA
Control_33	36	Female	Control	NA	NA	NA	NA	NA	NA	NA	NA	NA	217472	219186	2461.24	133222	728.116	465478	101228	126512	1261.49	76894.8	NA
Control_34	37	Female	Control	NA	NA	NA	NA	NA	NA	NA	NA	NA	311216	229329	2181.77	157159	390.412	429818	133766	112704	914.681	77235.8	NA
Control_35	41	Male	Control	NA	NA	NA	NA	NA	NA	NA	NA	NA	284285	165984	1424.14	168940	470.308	483143	137350	92370.9	725.225	94016.3	NA
Control_36	39	Male	Control	NA	NA	NA	NA	NA	NA	NA	NA	NA	135872	313211	730.17	124775	99.4604	515008	69975.3	185550	437.778	73918.3	NA
Control_37	69	Male	Control	NA	NA	NA	NA	NA	NA	NA	NA	NA	NA	NA	459.33	NA	94.0476	NA	NA	NA	211.888	NA	NA
Control_38	75	Female	Control	NA	NA	NA	NA	NA	NA	NA	NA	NA	427017	145297	1272.04	103706	475.131	567506	242335	98417.8	809.242	70245.5	NA
Control_39	28	Male	Control	NA	NA	NA	NA	NA	NA	NA	NA	NA	198648	121742	1521.96	179278	488.333	224247	44546.2	36583.5	445.355	53873.2	NA
Control_40	65	Female	Control	NA	NA	NA	NA	NA	NA	NA	NA	NA	377109	172166	625.67	277056	322.023	484919	182867	89088.3	335.848	143364	NA
Control_41	52	Female	Control	NA	NA	NA	NA	NA	NA	NA	NA	NA	401549	206474	675.201	134591	99.3366	443083	177919	98885.8	320.346	64459.2	NA
Control_42	45	Male	Control	NA	NA	NA	NA	NA	NA	NA	NA	NA	180439	307534	1621.15	122941	785.663	430203	77625.5	157303	788.212	62884.2	NA
Control_43	70	Female	Control	NA	NA	NA	NA	NA	NA	NA	NA	NA	222659	188706	418.839	146860	146.941	503010	112000	116359	243.421	90556.4	NA
Control_44	57	Male	Control	NA	NA	NA	NA	NA	NA	NA	NA	NA	175248	105580	1985.88	276156	602.732	455630	79848	57319.9	1059.61	149926	NA
Control_45	56	Male	Control	NA	NA	NA	NA	NA	NA	NA	NA	NA	263653	137133	1530.16	223061	NA	337402	88956.9	58720.2	516.277	95514.1	NA
Control_46	74	Male	Control	NA	NA	NA	NA	NA	NA	NA	NA	NA	536092	139870	331.481	136904	89.8392	413527	221688	68517.9	137.077	67065	NA
Control_47	59	Female	Control	NA	NA	NA	NA	NA	NA	NA	NA	NA	359517	118710	533.141	263430	163.934	418764	150553	65067.2	223.26	144391	NA
Control_48	38	Male	Control	NA	NA	NA	NA	NA	NA	NA	NA	NA	296705	230162	764.149	179400	240.98	364692	108206	104265	278.679	81269.8	NA
Control_49	24	Female	Control	NA	NA	NA	NA	NA	NA	NA	NA	NA	445334	246183	3346.76	116531	526.387	613342	273142	165799	2052.71	78480.9	NA
Control_50	51	Male	Control	NA	NA	NA	NA	NA	NA	NA	NA	NA	299386	276993	366.491	102193	141.097	453549	135786	142890	166.222	52717.7	NA
Control_51	68	Male	Control	NA	NA	NA	NA	NA	NA	NA	NA	NA	234962	189005	1204	258154	384.613	491228	115420	108902	591.44	148744	NA
Control_52	60	Male	Control	NA	NA	NA	NA	NA	NA	NA	NA	NA	179369	346682	1047.01	172746	189.823	554568	99472.4	221979	580.641	110608	NA
Control_53	37	Male	Control	NA	NA	NA	NA	NA	NA	NA	NA	NA	280478	162021	1562.12	191651	552.445	443696	124447	91502.3	693.107	108236	NA
Control_54	62	Female	Control	NA	NA	NA	NA	NA	NA	NA	NA	NA	362025	348047	527.109	68812.6	72.3728	549190	198820	235611	289.483	46582.8	NA
Control_55	30	Male	Control	NA	NA	NA	NA	NA	NA	NA	NA	NA	300978	195157	2193.77	179510	608.316	415267	124986	93696.7	910.998	86184.1	NA
Control_56	64	Male	Control	NA	NA	NA	NA	NA	NA	NA	NA	NA	471606	126319	430.741	181441	194.173	524879	247536	75537.5	226.087	108500	NA
Control_57	62	Female	Control	NA	NA	NA	NA	NA	NA	NA	NA	NA	407346	133004	719.356	223158	265.842	404247	164668	62901.3	290.797	105538	NA
Control_58	31	Male	Control	NA	NA	NA	NA	NA	NA	NA	NA	NA	407076	145129	1454.08	116042	644.763	517937	210839	85758.2	753.121	68570.4	NA
Control_59	60	Male	Control	NA	NA	NA	NA	NA	NA	NA	NA	NA	376354	118333	634.539	268887	305.165	438759	165129	64924.6	278.409	147528	NA
Control_60	67	Male	Control	NA	NA	NA	NA	NA	NA	NA	NA	NA	230250	190264	323.891	288844	165.331	479089	110310	115016	155.172	174608	NA
Control_61	70	Female	Control	NA	NA	NA	NA	NA	NA	NA	NA	NA	271880	118123	516.123	418656	107.885	468682	127425	63144.4	241.897	223800	NA
Control_62	59	Female	Control	NA	NA	NA	NA	NA	NA	NA	NA	NA	565513	69504.7	483.743	172299	167.91	577512	326591	49631.7	279.367	123035	NA
Control_63	59	Male	Control	NA	NA	NA	NA	NA	NA	NA	NA	NA	254565	255593	853.145	169814	304.854	574924	146355	159344	490.494	105867	NA
Control_64	68	Male	Control	NA	NA	NA	NA	NA	NA	NA	NA	NA	NA	164959	NA	215569	305.339	423430	NA	80424	NA	105099	NA
Control_65	39	Female	Control	NA	NA	NA	NA	NA	NA	NA	NA	NA	NA	NA	NA	NA	NA	NA	NA	NA	NA	NA	NA
Control_66	66	Male	Control	NA	NA	NA	NA	NA	NA	NA	NA	NA	NA	NA	NA	NA	NA	NA	NA	NA	NA	NA	NA
Control_67	71	Male	Control	NA	NA	NA	NA	NA	NA	NA	NA	NA	234783	81016.2	895.822	251847	258.102	329059	77257.5	30568.7	294.778	95025.8	NA
Control_68	65	Female	Control	NA	NA	NA	NA	NA	NA	NA	NA	NA	395768	113984	576.952	154321	99.9727	479200	189652	64427.9	276.475	87228.4	NA
Control_69	61	Male	Control	NA	NA	NA	NA	NA	NA	NA	NA	NA	82449.9	213604	210.869	166165	30.2464	459882	37917.2	114577	96.975	89130.9	NA
Control_70	79	Male	Control	NA	NA	NA	NA	NA	NA	NA	NA	NA	148331	147472	190.4	326175	40.1477	372551	55260.7	60681.2	70.9339	134213	NA
Control_71	74	Male	Control	NA	NA	NA	NA	NA	NA	NA	NA	NA	288448	99611.8	125.195	71465.5	7.40165	352577	101700	37289	44.1407	26752.6	NA
Control_72	57	Female	Control	NA	NA	NA	NA	NA	NA	NA	NA	NA	369084	76542.7	375.957	125630	277.869	285857	105505	31439.1	107.47	51601.4	NA
Control_73	64	Male	Control	NA	NA	NA	NA	NA	NA	NA	NA	NA	222083	48114.4	233.962	122928	42.5586	414088	91962	24182.8	96.8811	61784.9	NA
Control_74	56	Male	Control	NA	NA	NA	NA	NA	NA	NA	NA	NA	120063	130863	417.28	171073	197.254	475133	57046.2	71050.7	198.264	92882.4	NA
Control_75	55	Male	Control	NA	NA	NA	NA	NA	NA	NA	NA	NA	271754	38716.7	553.078	40309.2	100.98	388710	105634	18086.1	214.987	18830	NA
Control_76	74	Female	Control	NA	NA	NA	NA	NA	NA	NA	NA	NA	236956	197852	161.144	75989.6	173.23	458037	108535	107381	73.81	41242.2	NA
Control_77	62	Male	Control	NA	NA	NA	NA	NA	NA	NA	NA	NA	270381	71160.3	218.407	103428	21.1178	396401	107179	31278	86.5768	45461.2	NA
Control_78	65	Male	Control	NA	NA	NA	NA	NA	NA	NA	NA	NA	251809	146399	377.819	121428	189.916	468966	118090	71187.4	177.184	59045.4	NA
Control_79	68	Male	Control	NA	NA	NA	NA	NA	NA	NA	NA	NA	251648	108664	250.424	184846	38.3511	439255	110538	50676	110	86204	NA
Control_80	70	Male	Control	NA	NA	NA	NA	NA	NA	NA	NA	NA	45163.1	69567.8	39.5012	177251	38.7522	241767	10918.9	16953	9.5501	43194.4	NA
Control_81	68	Male	Control	NA	NA	NA	NA	NA	NA	NA	NA	NA	307274	255966	221.452	199938	17.442	469836	144368	130190	104.046	101693	NA
Control_82	70	Male	Control	NA	NA	NA	NA	NA	NA	NA	NA	NA	201163	213716	137.63	169032	15.7062	422355	84962.1	112939	58.1286	89325.3	NA
Control_83	64	Male	Control	NA	NA	NA	NA	NA	NA	NA	NA	NA	242657	96845.6	1340.22	97801.8	141.297	347516	84327.1	44217.2	465.746	44653.8	NA
Control_84	70	Male	Control	NA	NA	NA	NA	NA	NA	NA	NA	NA	200710	156105	242.814	42974.9	48.0624	430366	86379	74796.6	104.499	20591.2	NA
Control_85	70	Female	Control	NA	NA	NA	NA	NA	NA	NA	NA	NA	92321.5	143200	305.483	271863	54.4198	208796	19276.3	54932	63.7836	104287	NA
Control_86	70	Female	Control	NA	NA	NA	NA	NA	NA	NA	NA	NA	105623	102778	316.269	374770	128.325	407326	43023	43614.3	128.825	159036	NA
