# Supplementary material for: Innate lymphoid cells and COVID-19 severity in SARS-CoV-2 infection
Source: eLife. 2022 Mar 11;11:e74681. doi: 10.7554/eLife.74681 (PMC9038195; doi:10.7554/eLife.74681)
Supplement: Figure 4—source data 1. — Data included in this file are associated with Figures 1 and 4; Figure 4—figure supplement 1; Figure 4—figure supplement 2; Table 5, and Supplementary file 2f,g. File name: Pediatric_ COVID_MISC_andControl_data.xlsx. [file elife-74681-fig4-data1.xlsx]

## Sheet: Sheet1
SampleID	Age	Sex	Group	HospitalizedForCOVID(1=yes)	max_crp_value	CD4perMillionLymphocytes	CD8perMillionLymphocytes	ILCperMillionLymphocytes	CD16posNKcellperMillionLymphocytes
Control_1	12	Female	Control	NA	NA	488611	259461	2321.68	54022.1
Control_10	13	Female	Control	NA	NA	451938	146416	4938.83	32308.1
Control_11	16	Male	Control	NA	NA	366775	214459	1621.48	41969.3
Control_12	5	Male	Control	NA	NA	593260	190807	1912.99	71956.7
Control_13	17	Female	Control	NA	NA	440599	243129	1059.99	49588.5
Control_14	5	Female	Control	NA	NA	373624	174334	3266.63	175196
Control_15	7	Female	Control	NA	NA	377885	104741	1516.49	33349.9
Control_16	15	Male	Control	NA	NA	359819	294385	3851.62	67359
Control_17	8	Male	Control	NA	NA	216473	253315	3204.24	108197
Control_2	9	Female	Control	NA	NA	390655	144304	4078.19	183004
Control_3	10	Female	Control	NA	NA	323785	290671	6634.86	74390.8
Control_4	2	Male	Control	NA	NA	411312	249960	8994.13	119064
Control_5	9	Male	Control	NA	NA	441756	247348	5349.25	36358.9
Control_6	9	Male	Control	NA	NA	436198	246871	5192.84	35511.8
Control_7	10	Female	Control	NA	NA	343465	350006	2769.81	60401.7
Control_8	19	Female	Control	NA	NA	466789	232706	1660.27	137867
Control_9	14	Male	Control	NA	NA	393613	248721	1648.29	138133
COVID_1	13	Male	COVID	0	NA	458954	179572	3351.31	70507
COVID_10	0.660274	Male	COVID	1	70.4	249654	171125	4302.74	175688
COVID_11	9.04384	Female	COVID	0	NA	457683	187384	2176.24	86104.8
COVID_12	17.7781	Male	COVID	1	145.8	239481	247743	1217.13	230648
COVID_13	5.30959	Female	COVID	1	0.2	708475	120539	1291	51377.3
COVID_14	15.189	Female	COVID	0	NA	378989	253427	830.41	101770
COVID_15	16.1205	Male	COVID	0	NA	362303	264275	764.008	161292
COVID_16	19.726	Female	COVID	0	NA	512363	280800	616.419	98796.8
COVID_17	11.4685	Male	COVID	0	NA	276979	170318	7053.23	313087
COVID_18	21.3945	Male	COVID	0	NA	264449	NA	584.192	NA
COVID_19	16.0548	Female	COVID	0	NA	393688	251100	4375.42	205553
COVID_2	13	Male	COVID	1	26.6	479703	218657	581.168	86702.7
COVID_3	15	Male	COVID	1	33.6	446896	259460	1481.51	17051
COVID_4	13.8164	Male	COVID	1	146.5	368193	293946	338.598	60551.1
COVID_5	19.1507	Male	COVID	1	385	373998	231662	592.846	36647
COVID_6	14.9863	Female	COVID	1	208.5	322416	113398	3187.6	102580
COVID_7	20.3315	Male	COVID	1	13.1	332401	242694	4045.36	188079
COVID_8	3.05205	Male	COVID	1	158.3	606815	196769	2585.89	12573.4
COVID_9	1.55068	Male	COVID	1	NA	400384	265827	1711.95	154040
COVID_1_followup	13.737	Male	COVID follow-up	0	NA	438482	165851	3045.27	45328.6
COVID_18_followup	22.0411	Male	COVID follow-up	0	NA	341020	272565	1158.42	185332
COVID_19_followup	16.5699	Female	COVID follow-up	0	NA	389929	157895	5135.49	102339
COVID_2_followup	13.4959	Male	COVID follow-up	1	NA	294353	188601	500.459	216657
COVID_6_followup	15.6658	Female	COVID follow-up	1	NA	375019	117881	2711.54	63676.4
COVID_followup_noAcuteSample_1	11.1452	Male	COVID follow-up	1	NA	183263	139796	4068.36	18891.1
COVID_followup_noAcuteSample_2	1.03288	Female	COVID follow-up	0	NA	499691	178342	1940.52	52325.6
COVID_followup_noAcuteSample_3	19.8493	Male	COVID follow-up	0	NA	209904	166915	980.937	197276
COVID_followup_noAcuteSample_4	17.8767	Female	COVID follow-up	0	NA	479282	209469	2679.06	136118
COVID_followup_noAcuteSample_5	7.83562	Male	COVID follow-up	0	NA	510819	256063	2275.18	40504.2
COVID_followup_noAcuteSample_6	9.11781	Female	COVID follow-up	0	NA	596569	132712	1607.73	111694
COVID_followup_noAcuteSample_7	11.0603	Female	COVID follow-up	0	NA	433222	273227	1720.02	52259.6
COVID_followup_noAcuteSample_8	19.0986	Male	COVID follow-up	0	NA	368263	386168	612.591	93053.2
COVID_followup_noAcuteSample_9	14.5671	Female	COVID follow-up	1	NA	366587	181871	2810.85	221262
MIS_C_1	19.4493	Male	MIS-C	0	237	285766	221663	1090.82	81530.7
MIS_C_10	7	Male	MIS-C	0	196.5	86026.3	57535	748.055	57798.9
MIS_C_11	15	Male	MIS-C	0	77.4	418784	154619	3041.14	114125
MIS_C_2	8	Female	MIS-C	0	148.5	408108	217863	1611.71	44207.6
MIS_C_3	12.5425	Male	MIS-C	0	146	238751	251147	1857.27	88429.3
MIS_C_4	3.2	Female	MIS-C	0	149.4	245165	168016	3471.03	67683.6
MIS_C_5	3.50959	Male	MIS-C	0	132.5	205151	134227	1907.92	5289.14
MIS_C_6	13.5863	Male	MIS-C	0	122.9	296806	137985	1357.79	27820.6
MIS_C_7	22.0027	Male	MIS-C	0	300	166607	98935.6	236.995	15110.6
MIS_C_8	1.17808	Female	MIS-C	0	9	326977	270429	2602.64	178047
MIS_C_9	5.6137	Female	MIS-C	0	250.8	204035	NA	1235.33	NA
MIS_C_10_followup	7.77534	Male	MIS-C follow-up	0	NA	339042	170992	5512.63	131937
MIS_C_3_followup	13.0767	Male	MIS-C follow-up	0	NA	244367	288490	4376	72547.5
MIS_C_4_followup	2.76164	Female	MIS-C follow-up	0	NA	438519	210883	5105.77	88490.1
MIS_C_5_followup	4.03014	Male	MIS-C follow-up	0	NA	302510	349441	2721.37	21414.7
MIS_C_9_followup	5.76712	Female	MIS-C follow-up	0	NA	462003	306462	2674.19	83027.4
MIS_C_followup_noAcuteSample_1	2.14795	Male	MIS-C follow-up	0	NA	212794	278205	10560.3	229748
MIS_C_followup_noAcuteSample_2	8.44932	Male	MIS-C follow-up	0	NA	427898	206242	8709.76	157175
