# Supplementary material for: Innate lymphoid cells and COVID-19 severity in SARS-CoV-2 infection
Source: eLife. 2022 Mar 11;11:e74681. doi: 10.7554/eLife.74681 (PMC9038195; doi:10.7554/eLife.74681)
Supplement: Figure 6—source data 1. — File name: AREG_in_ILCs.xlsx. [file elife-74681-fig6-data1.xlsx]

## Sheet: Sheet1
SampleID	Age	Sex	AREGposILC_percent_stimulated_with_PMA_ionomycin	AREG_MFI_in_ILCs
M44	30	Male	35.2	1235
M46	62	Female	46.2	1125
M47	31	Male	58.6	1780
M49	67	Male	69.2	2170
M50	70	Female	35.4	2316
M51	59	Female	54.5	1324
M52	59	Male	42	1220
M53	68	Male	49.2	1425
M60	71	Male	56.5	1747
M61	65	Female	49.1	2197
M62	61	Male	34.4	1136
M63	79	Male	52.8	2216
M64	74	Male	37.2	1460
M65	57	Female	69.6	1644
M66	64	Male	37.4	1316
M67	56	Male	33.4	1240
M68	55	Male	29.8	1223
M69	74	Female	47.1	1585
M70	62	Male	21.3	1513
M71	65	Male	37.2	1305
M72	68	Male	38	1719
M73	70	Male	53	2094
M74	68	Male	48.9	1411
M75	70	Male	16.7	2436
M76	64	Male	39.2	1471
M77	70	Male	34.3	1123
M78	70	Female	62.2	2069
M79	70	Female	54.5	1377
M94	62	Female	50.6	1688
M95	49	Male	55.1	1769
M96	24	Male	35.2	1182
M97	41	Female	34.3	1411
M98	82	Male	50	1369
M99	58	Female	56.5	2738
N01	38	Male	33.3	1125
N02	66	Male	30.7	1364
N03	66	Female	54.3	1920
N04	64	Female	54.3	2767
