# Supplementary material for: Innate lymphoid cells and COVID-19 severity in SARS-CoV-2 infection
Source: eLife. 2022 Mar 11;11:e74681. doi: 10.7554/eLife.74681 (PMC9038195; doi:10.7554/eLife.74681)
Supplement: Supplementary file 1. — (a) Antibodies Used in Flow Cytometry. (b) Primers for bulk RNA-Seq. [file elife-74681-supp1.xlsx]

## Sheet: 1a
Supplementary file 1a: Antibodies Used in Flow Cytometry
Targeting antigen	Company	Catalog/Clone
Anti-Human BDCA1	Biolegend	Cat# 354208 Clone: 201A (FITC) (1:200 dilution)
Anti-Human CD117	Biolegend	Cat# 313206 Clone: 104D2 (APC) (1:200 dilution)
Anti-Human CD11c	Biolegend	Cat# 301604 Clone: 3.9 (FITC) (1:200 dilution)
Anti-Human CD123	Biolegend	Cat# 306014 Clone: 6H6 (FITC) (1:200 dilution)
Anti-Human CD127	Biolegend	Cat# 351320 Clone: A019D5 (PE/Cyanine7) (1:200 dilution)
Anti-Human CD14	Biolegend	Cat# 325604 Clone: HCD14 (FITC) (1:200 dilution)
Anti-Human CD16	Biolegend	Cat# 980104 Clone: 3G8 (APC) (1:400 diltuion)
Anti-Human CD19	Biolegend	Cat# 302206 Clone: HIB19 (FITC) (1:200 dilution)
Anti-Human CD1a	Biolegend	Cat# 300104 Clone: HI149 (FITC) (1:200 dilution)
Anti-Human CD20	Biolegend	Cat# 302304 Clone: 2H7a (FITC) (1:200 dilution)
Anti-Human CD22	Biolegend	Cat# 363508 Clone: S-HCL-1 (FITC) (1:200 dilution)
Anti-Human CD3	Biolegend	Cat# 317306 Clone: OKT3 (FITC) (1:200 dilution)
Anti-Human CD34	Biolegend	Cat# 343504 Clone: 581 (FITC) (1:200 dilution)
Anti-Human CD4	Biolegend	Cat# 317428 Clone: OKT4 (PerCP/Cyanine5.5) (1:200 dilution)
Anti-Human CD4	Biolegend	Cat# 317408 Clone: OKT4 (FITC) (1:200 dilution)
Anti-Human CD45	BD	Cat# 560178 Clone: 2D1 (APC/H7) (1:200 diltuion)
Anti-Human CD56	Biolegend	Cat# 318306 Clone: HCD56 (PE) (1:200 dilution)
Anti-Human CD8	Biolegend	Cat# 300924 Clone: HIT8a (PerCP/Cyanine 5.5) (1:200 dilution)
Anti-Human CRTH2	Biolegend	Cat# 350116 Clone: BM16 (PerCP/Cyanine5.5) (1:200 dilution)
Anti-Human FcεR1α	Biolegend	Cat# 334608 Clone: AER-37 (FITC) (1:200 dilution)
Anti-Human TBX21	ebioscience	Cat# 25-5825-82 Clone: ebio4B10 (PE/Cyanine7) (1:200 dilution)
Anti-Human TCRα/β	Biolegend	Cat# 306706 Clone: IP26 (FITC) (1:200 dilution)
Anti-Human TCRγ/δ	Biolegend	Cat# 331208 Clone: B1 (FITC) (1:200 dilution)
Anti-Human TCF7	Cell Signaling	Cat# 37636s Clone: C63D9 (APC) (1:200 dilution)
Anti-Human IL-13	Biolegend	Cat# 501908 Clone: JES10-5A2 (APC) (1:200 dilution)
Anti-Human AREG	ebioscience	Cat# 17-5370-42 Clone: AREG559
mouse IgG1, k isotype control	Biolegend	Cat# 400112 Clone: MOPC-21 (PE) (1:200 dilution)
mouse IgG1, k isotype control	Biolegend	Cat# 400120 Clone: MOPC-21 (APC) (1:200 dilution)
Rabbit IgG, isotype control	Cell Signaling	Cat# 3452S (Alexa Fluor 647) (1:200 dilution)
Rat IgG1, k isotype control	Biolegend	Cat# 400412 Clone: RTK2071 (APC) (1:200 dilution)

## Sheet: 1b
Supplementary file 1b: Primers for bulk RNA-Seq
Barcoded primers for reverse transcription and final library amplification in bulk RNA-Seq
Reverse transcription primers for 5 ILC sorted from blood (raw reads deposited in GSM5134071)
donor 1 ILCs: GCCGGTAATACGACTCACTATAGGGAGTTCTACAGTCCGACGATCNNNNNNGTTGCATTTTTTTTTTTTTTTTTTTTTTTTV
donor 2 ILCs: GCCGGTAATACGACTCACTATAGGGAGTTCTACAGTCCGACGATCNNNNNNACCATGTTTTTTTTTTTTTTTTTTTTTTTTV
donor 3 ILCs: GCCGGTAATACGACTCACTATAGGGAGTTCTACAGTCCGACGATCNNNNNNACTCGATTTTTTTTTTTTTTTTTTTTTTTTV
donor 4 ILCs: GCCGGTAATACGACTCACTATAGGGAGTTCTACAGTCCGACGATCNNNNNNACGTACTTTTTTTTTTTTTTTTTTTTTTTTV
donor 5 ILCs: GCCGGTAATACGACTCACTATAGGGAGTTCTACAGTCCGACGATCNNNNNNCTGTGATTTTTTTTTTTTTTTTTTTTTTTTV
Reverse transcription primers for 4 ILC samples sorted from blood (raw reads deposited in GSM5134072)
donor1 ILCs: GCCGGTAATACGACTCACTATAGGGAGTTCTACAGTCCGACGATCNNNNNNTCACCATTTTTTTTTTTTTTTTTTTTTTTTV
donor2 ILCs: GCCGGTAATACGACTCACTATAGGGAGTTCTACAGTCCGACGATCNNNNNNTCTGTCTTTTTTTTTTTTTTTTTTTTTTTTV
donor3 ILCs: GCCGGTAATACGACTCACTATAGGGAGTTCTACAGTCCGACGATCNNNNNNGTTGAGTTTTTTTTTTTTTTTTTTTTTTTTV
donor4 ILCs: GCCGGTAATACGACTCACTATAGGGAGTTCTACAGTCCGACGATCNNNNNNACAGACTTTTTTTTTTTTTTTTTTTTTTTTV
Final library amplification primers for all libraries:
RP1: AAT GAT ACG GCG ACC ACC GAG ATC TAC ACG TTC AGA GTT CTA CAG TCC GA
RPI1: CAA GCA GAA GAC GGC ATA CGA GAT CGT GAT GTG ACT GGA GTT CCT TGG CAC CCG AGA ATT CCA
