# Supplementary material for: Innate lymphoid cells and COVID-19 severity in SARS-CoV-2 infection
Source: eLife. 2022 Mar 11;11:e74681. doi: 10.7554/eLife.74681 (PMC9038195; doi:10.7554/eLife.74681)
Supplement: Supplementary file 2. — (a) Race and Ethnicity of Adult Cohorts (b) Demographic and Clinical Characteristics of Pediatric Blood Donor Groups (c) Comparison of sex ratios between control age groups (d) Change in Lymphocyte Abundance Per 106 PBMCs Due to Age, Sex, and COVID-19 Severity in Adult cohorts (e) Change in Lymphoid Cell Abundance Per 106 PBMCs Due to Age, Sex, and COVID-19 Severity (f) Odds of Hospitalization in Pediatric Cohort (g) Change in Pediatric Cohort Lymphoid Cell Abundance Per 106 lymphocytes due to Group; Adjusted for Effects of Age and Sex with Combined Pediatric and Adult Control Data (h) Gene ontology analysis results. [file elife-74681-supp2.xlsx]

## Sheet: 2a
Supplementary file 2a: Race and Ethnicity of Adult Cohorts
Characteristic	Healthy Control	Hospitalized	Outpatient
	N=86	N=40	N=51
Race or ethnic group – number (%)
White	25 (29.1)	17 (42.5)	46 (90.2)
Black or African American	0 (0)	6 (15)	2 (3.9)
Asian	1 (1.2)	1 (2.5)	1 (2)
Unknown or not reported	60 (69.8)	16 (40)	2 (3.9)
Hispanic or latinx	1 (1.2)	11 (27.5)	3 (5.9)
Percentages may not equal 100 because of rounding

## Sheet: 2b
Supplementary file 2b: Demographic and Clinical Characteristics of Pediatric Blood Donor Groups
Characteristic	Control N=17	COVID-19 N=19	COVID follow-up N=14		MIS-C	MISC-C follow-up N=7
					N=11
Mean age (range) - years	10.6 (2-19)	13 (0.7-21.4)	13.8 (1-22)	10.1 (1.2-22)		6.3 (2.2-13.1)
Sex – number (%)
Male	8 (47.1)	13 (68.4)	7 (50)	7 (63.6)		5 (71.4)
Female	9 (52.9)	6 (31.6)	7 (50)	4 (36.4)		2 (28.6)
Hospital admission for COVID-19 – number (%)		11 (57.9)	4 (28.6)	0		0
Hospital admission for MIS-C – number (%)				11 (100)		7 (100)
Intubation with mechanical ventilation or ECMO – number (%)		1 (5.3)	0	1 (9.1)		1 (14.3)
Deaths – number (%)		0	0	0		0
Mean time hospitalized (range) – days		8 (2-17)		7.5 (1-16)
Max lab value – mean (range)
CRP – mg/L		119 (0.2-385)		161 (9-300)

## Sheet: 2c
Supplementary file 2c: Comparison of sex ratios between control age groups
Compared groups
Age group 1		Age group 2		P-Valuea	Adjusted P-Valueb
<20		20-39		0.765	1
<20		40-59		0.517	1
<20		>60		0.246	1
20-39		40-59		0.252	1
20-39		>60		0.0817	0.49
40-59		>60		0.778	1
aFrom Fisher’s exact test
bAdjusted with Bonferroni correction for multiple comparisons

## Sheet: 2d
Supplementary file 2d: Change in Lymphocyte Abundance Due to Age, Sex, and COVID-19 Severity in Adult cohorts
Fold difference (log2) [±95%CI]
	Lymphocytesa
Age	-0.008*** [-0.012, -0.004]
Male	-0.267*** [-0.400, -0.135]
Hospitalized	-0.411*** [-0.572, -0.250]
Outpatient	0.129 [-0.030, 0.289]
R2	0.416
* p < 0.05, ** p < 0.01, *** p < 0.001
aper 106 PBMCs ‘

## Sheet: 2e
Supplementary file 2e: Change in Cell Abundance Due to Age, Sex, and COVID-19 Severity
Fold difference (log2) [±95%CI]
	CD4+ Ta	ILCa	CD8+ Ta	CD16+ NKa
Age	-0.020***	-0.051***	-0.017***	0.014*
	[-0.029, -0.010]	[-0.063, -0.040]	[-0.025, -0.008]	[0.002, 0.026]
Male	-0.678***	-0.609**	-0.411**	-0.049
	[-0.980, -0.375]	[-0.983, -0.235]	[-0.688, -0.134]	[-0.435, 0.336]
Hospitalized	-0.241	-1.280***	-0.034	-1.466***
	[-0.608, 0.126]	[-1.734, -0.826]	[-0.369, 0.301]	[-1.932, -0.999]
Outpatient	0.461*	0.009	0.224	-0.276
	[0.099, 0.824]	[-0.441, 0.458]	[-0.110, 0.558]	[-0.741, 0.189]
R2	0.364	0.552	0.224	0.194
* p < 0.05, ** p < 0.01, *** p < 0.001
aper 106 PBMCs

## Sheet: 2f
Supplementary file 2f: Odds of Hospitalization in Pediatric Cohorta
Cell countb		Odds Ratioc	95% Confidence Interval	P-Value
CD4+ T		1.75	0.0593 – 43.3	0.724
ILC		0.712	0.26– 1.73	0.463
CD8+ T		0.217	0.00509 – 5.9	0.366
CD16+ NK		0.386	0.0554 – 1.23	0.194
aAdjusted for age and sex
bper 106 lymphocytes
cper 2-fold increase in cell population abundance

## Sheet: 2g
Supplementary file 2g: Change in Pediatric Cohort Cell Abundance due to Group; Adjusted for Effects of Age and Sex with Combined Pediatric and Adult Control Data
Fold difference (log2) [±95%CI]
	CD4+ Ta	ILCa	CD8+ Ta	CD16+ NKa
COVID	-0.085	-0.924**	-0.078	0.4
	[-0.421, 0.251]	[-1.474, -0.373]	[-0.424, 0.269]	[-0.161, 0.961]
MIS-C	-0.814***	-1.183***	-0.538*	-0.493
	[-1.224, -0.404]	[-1.856, -0.511]	[-0.969, -0.106]	[-1.190, 0.205]
R2	0.292	0.541	0.165	0.261
* p < 0.05, ** p < 0.01, *** p < 0.001
aper 106 lymphocytes

## Sheet: 2h
Supplementary file 2h: Gene ontology analysis results
ID	Description	GeneRatio	BgRatio	pvalue	p.adjust	qvalue	geneID	Count
GO:0032616	interleukin-13 production	7/294	17/9263	4.47e-07	0.00112026	0.00100638	IL17RA/NLRP3/IL18/TNFSF4/ARG2/GATA3/RARA	7
GO:0042092	type 2 immune response	8/294	25/9263	6.33e-07	0.00112026	0.00100638	NLRP3/CD81/IL18/BCL3/TNFSF4/ARG2/GATA3/RARA	8
GO:0002711	positive regulation of T cell mediated immunity	9/294	36/9263	1.28e-06	0.00122325	0.0010989	NLRP3/CD81/IL18/HLA-B/IL23R/HSPD1/TNFSF4/HLA-A/GATA3	9
GO:0045064	T-helper 2 cell differentiation	6/294	13/9263	1.38e-06	0.00122325	0.0010989	NLRP3/IL18/BCL3/TNFSF4/GATA3/RARA	6
GO:0002830	positive regulation of type 2 immune response	6/294	14/9263	2.35e-06	0.00123526	0.00110969	NLRP3/CD81/IL18/TNFSF4/GATA3/RARA	6
GO:0002828	regulation of type 2 immune response	7/294	21/9263	2.4e-06	0.00123526	0.00110969	NLRP3/CD81/IL18/TNFSF4/ARG2/GATA3/RARA	7
GO:0002709	regulation of T cell mediated immunity	10/294	49/9263	2.44e-06	0.00123526	0.00110969	NLRP3/CD81/IL18/HLA-B/IL23R/HSPD1/TNFSF4/HLA-A/GATA3/WAS	10
GO:0032656	regulation of interleukin-13 production	6/294	15/9263	3.82e-06	0.00169036	0.00151854	IL17RA/NLRP3/TNFSF4/ARG2/GATA3/RARA	6
GO:0002708	positive regulation of lymphocyte mediated immunity	12/294	79/9263	6.38e-06	0.00212609	0.00190997	NLRP3/CD81/IL18/HLA-B/CD28/LAMP1/IL23R/HSPD1/TNFSF4/HLA-A/GATA3/EXOSC6	12
GO:0002706	regulation of lymphocyte mediated immunity	14/294	107/9263	6.6e-06	0.00212609	0.00190997	NLRP3/CD81/IL18/HLA-B/CD28/LAMP1/IL23R/HSPD1/TNFSF4/HLA-A/ARRB2/GATA3/EXOSC6/WAS	14
GO:0046631	alpha-beta T cell activation	14/294	107/9263	6.6e-06	0.00212609	0.00190997	RASAL3/FOXP1/NLRP3/CD81/IL18/RC3H1/CD28/BCL3/IL23R/TCF7/TNFSF4/ARG2/GATA3/RARA	14
GO:0035710	CD4-positive, alpha-beta T cell activation	11/294	69/9263	9.66e-06	0.00274122	0.00246257	FOXP1/NLRP3/CD81/IL18/RC3H1/BCL3/IL23R/TNFSF4/ARG2/GATA3/RARA	11
GO:0051251	positive regulation of lymphocyte activation	20/294	209/9263	1.02e-05	0.00274122	0.00246257	CD6/RASAL3/NLRP3/GRAP2/CD81/IL18/CD28/FLT3LG/CD5/LAMP1/IL23R/HSPD1/TNFSF4/RAC1/CDC42/ADAM8/CSK/GATA3/RARA/EXOSC6	20
GO:0050870	positive regulation of T cell activation	17/294	159/9263	1.11e-05	0.00274122	0.00246257	CD6/RASAL3/NLRP3/GRAP2/CD81/IL18/CD28/CD5/IL23R/HSPD1/TNFSF4/RAC1/CDC42/ADAM8/CSK/GATA3/RARA	17
GO:0032736	positive regulation of interleukin-13 production	5/294	23316	1.23e-05	0.00274122	0.00246257	IL17RA/NLRP3/TNFSF4/GATA3/RARA	5
GO:0042093	T-helper cell differentiation	9/294	47/9263	1.36e-05	0.00274122	0.00246257	FOXP1/NLRP3/IL18/RC3H1/BCL3/IL23R/TNFSF4/GATA3/RARA	9
GO:2000514	regulation of CD4-positive, alpha-beta T cell activation	9/294	47/9263	1.36e-05	0.00274122	0.00246257	NLRP3/CD81/IL18/RC3H1/IL23R/TNFSF4/ARG2/GATA3/RARA	9
GO:0050863	regulation of T cell activation	21/294	232/9263	1.44e-05	0.00274122	0.00246257	CD6/RASAL3/CASP3/NLRP3/GRAP2/CD81/IL18/RC3H1/CD28/CD5/IL23R/HSPD1/LAT/TNFSF4/RAC1/ARG2/CDC42/ADAM8/CSK/GATA3/RARA	21
GO:0046634	regulation of alpha-beta T cell activation	11/294	72/9263	1.47e-05	0.00274122	0.00246257	RASAL3/NLRP3/CD81/IL18/RC3H1/CD28/IL23R/TNFSF4/ARG2/GATA3/RARA	11
GO:0046649	lymphocyte activation	34/294	498/9263	1.83e-05	0.00302412	0.00271671	CD6/RASAL3/FOXP1/CASP3/NLRP3/GRAP2/CD81/IL18/RC3H1/IRF2BP2/CD28/FLT3LG/CD5/HDAC9/LAMP1/BCL3/PLCG2/IL23R/AKAP17A/TCF7/HSPD1/LAT/TNFSF4/RAC1/ARG2/ZBTB7A/CDC42/ADAM8/CSK/GATA3/RARA/EXOSC6/STK11/WAS	34
GO:0002824	positive regulation of adaptive immune response based on somatic recombination of immune receptors built from immunoglobulin superfamily domains	11/294	74/9263	1.92e-05	0.00302412	0.00271671	NLRP3/CD81/IL18/HLA-B/CD28/IL23R/HSPD1/TNFSF4/HLA-A/GATA3/EXOSC6	11
GO:0002294	CD4-positive, alpha-beta T cell differentiation involved in immune response	9/294	49/9263	1.94e-05	0.00302412	0.00271671	FOXP1/NLRP3/IL18/RC3H1/BCL3/IL23R/TNFSF4/GATA3/RARA	9
GO:0002822	regulation of adaptive immune response based on somatic recombination of immune receptors built from immunoglobulin superfamily domains	13/294	103/9263	2.1e-05	0.00302412	0.00271671	NLRP3/CD81/IL18/RC3H1/HLA-B/CD28/IL23R/HSPD1/TNFSF4/HLA-A/GATA3/EXOSC6/WAS	13
GO:0022407	regulation of cell-cell adhesion	23/294	276/9263	2.16e-05	0.00302412	0.00271671	CD6/RASAL3/CASP3/NLRP3/GRAP2/CD81/IL18/RC3H1/CD28/CD5/TNR/IL23R/ADAM19/HSPD1/TNFSF4/RAC1/ARG2/CDC42/ADAM8/CSK/GATA3/RGCC/RARA	23
GO:0022409	positive regulation of cell-cell adhesion	18/294	185/9263	2.27e-05	0.00302412	0.00271671	CD6/RASAL3/NLRP3/GRAP2/CD81/IL18/CD28/CD5/IL23R/ADAM19/HSPD1/TNFSF4/RAC1/CDC42/ADAM8/CSK/GATA3/RARA	18
GO:0002287	alpha-beta T cell activation involved in immune response	9/294	50/9263	2.31e-05	0.00302412	0.00271671	FOXP1/NLRP3/IL18/RC3H1/BCL3/IL23R/TNFSF4/GATA3/RARA	9
GO:0002293	alpha-beta T cell differentiation involved in immune response	9/294	50/9263	2.31e-05	0.00302412	0.00271671	FOXP1/NLRP3/IL18/RC3H1/BCL3/IL23R/TNFSF4/GATA3/RARA	9
GO:0002285	lymphocyte activation involved in immune response	15/294	136/9263	2.54e-05	0.00321286	0.00288626	FOXP1/NLRP3/CD81/IL18/RC3H1/CD28/LAMP1/BCL3/PLCG2/IL23R/HSPD1/TNFSF4/GATA3/RARA/EXOSC6	15
GO:1903039	positive regulation of leukocyte cell-cell adhesion	17/294	171/9263	2.9e-05	0.00354228	0.0031822	CD6/RASAL3/NLRP3/GRAP2/CD81/IL18/CD28/CD5/IL23R/HSPD1/TNFSF4/RAC1/CDC42/ADAM8/CSK/GATA3/RARA	17
GO:1903037	regulation of leukocyte cell-cell adhesion	20/294	225/9263	3.01e-05	0.00354723	0.00318665	CD6/RASAL3/CASP3/NLRP3/GRAP2/CD81/IL18/RC3H1/CD28/CD5/IL23R/HSPD1/TNFSF4/RAC1/ARG2/CDC42/ADAM8/CSK/GATA3/RARA	20
GO:0042110	T cell activation	26/294	344/9263	3.46e-05	0.00384309	0.00345243	CD6/RASAL3/FOXP1/CASP3/NLRP3/GRAP2/CD81/IL18/RC3H1/CD28/CD5/BCL3/IL23R/TCF7/HSPD1/LAT/TNFSF4/RAC1/ARG2/CDC42/ADAM8/CSK/GATA3/RARA/STK11/WAS	26
GO:0045785	positive regulation of cell adhesion	22/294	265/9263	3.47e-05	0.00384309	0.00345243	CD6/RASAL3/NLRP3/GRAP2/CD81/IL18/DOCK5/CD28/CD5/SPOCK2/IL23R/ADAM19/HSPD1/RSU1/TNFSF4/RAC1/CDC42/ADAM8/CSK/GATA3/RARA/ITGB1BP1	22
GO:0002821	positive regulation of adaptive immune response	11/294	79/9263	3.61e-05	0.00387396	0.00348017	NLRP3/CD81/IL18/HLA-B/CD28/IL23R/HSPD1/TNFSF4/HLA-A/GATA3/EXOSC6	11
GO:0046640	regulation of alpha-beta T cell proliferation	6/294	22/9263	4.72e-05	0.00482039	0.00433039	RASAL3/CD81/IL18/CD28/TNFSF4/ARG2	6
GO:0051249	regulation of lymphocyte activation	24/294	310/9263	4.76e-05	0.00482039	0.00433039	CD6/RASAL3/CASP3/NLRP3/GRAP2/CD81/IL18/RC3H1/CD28/FLT3LG/CD5/LAMP1/IL23R/HSPD1/LAT/TNFSF4/RAC1/ARG2/CDC42/ADAM8/CSK/GATA3/RARA/EXOSC6	24
GO:0002696	positive regulation of leukocyte activation	20/294	235/9263	5.59e-05	0.00549879	0.00493983	CD6/RASAL3/NLRP3/GRAP2/CD81/IL18/CD28/FLT3LG/CD5/LAMP1/IL23R/HSPD1/TNFSF4/RAC1/CDC42/ADAM8/CSK/GATA3/RARA/EXOSC6	20
GO:0002292	T cell differentiation involved in immune response	9/294	56/9263	5.9e-05	0.00564657	0.00507259	FOXP1/NLRP3/IL18/RC3H1/BCL3/IL23R/TNFSF4/GATA3/RARA	9
GO:0043367	CD4-positive, alpha-beta T cell differentiation	9/294	57/9263	6.81e-05	0.00634978	0.00570432	FOXP1/NLRP3/IL18/RC3H1/BCL3/IL23R/TNFSF4/GATA3/RARA	9
GO:0050865	regulation of cell activation	27/294	381/9263	7.46e-05	0.00677255	0.00608411	CD6/RASAL3/CASP3/NLRP3/GRAP2/CD81/IL18/RC3H1/CD28/FLT3LG/CD5/LAMP1/LMO4/IL23R/HSPD1/TSPAN32/LAT/TNFSF4/RAC1/ARG2/CDC42/ADAM8/CSK/GATA3/RARA/EXOSC6/TEC	27
GO:0001817	regulation of cytokine production	31/294	468/9263	7.76e-05	0.00686707	0.00616902	PCBP2/HSF1/CD6/FOXP1/HSPA1B/IL17RA/NLRP3/CD81/IL18/IRAK3/DDX3X/LTB/CD28/HDAC9/HSPA1A/BCL3/TXK/PLCG2/IFNGR1/IL23R/HSPD1/TMSB4X/TNFSF4/RAC1/ARG2/ADAM8/CSK/ARRB2/GATA3/RGCC/RARA	31
GO:0050867	positive regulation of cell activation	20/294	241/9263	7.96e-05	0.00687411	0.00617535	CD6/RASAL3/NLRP3/GRAP2/CD81/IL18/CD28/FLT3LG/CD5/LAMP1/IL23R/HSPD1/TNFSF4/RAC1/CDC42/ADAM8/CSK/GATA3/RARA/EXOSC6	20
GO:0031295	T cell costimulation	8/294	46/9263	8.54e-05	0.00701177	0.00629902	GRAP2/CD81/CD28/CD5/TNFSF4/RAC1/CDC42/CSK	8
GO:0030155	regulation of cell adhesion	29/294	427/9263	8.6e-05	0.00701177	0.00629902	CD6/RASAL3/CASP3/CD164/NLRP3/GRAP2/CD81/IL18/RC3H1/DOCK5/CD28/CD5/SPOCK2/TNR/IL23R/ADAM19/HSPD1/RSU1/TNFSF4/RAC1/ARG2/CDC42/ADAM8/CSK/ARHGDIA/GATA3/RGCC/RARA/ITGB1BP1	29
GO:0002705	positive regulation of leukocyte mediated immunity	12/294	102/9263	8.78e-05	0.00701177	0.00629902	NLRP3/CD81/IL18/HLA-B/CD28/LAMP1/IL23R/HSPD1/TNFSF4/HLA-A/GATA3/EXOSC6	12
GO:0002819	regulation of adaptive immune response	13/294	118/9263	8.91e-05	0.00701177	0.00629902	NLRP3/CD81/IL18/RC3H1/HLA-B/CD28/IL23R/HSPD1/TNFSF4/HLA-A/GATA3/EXOSC6/WAS	13
GO:0031294	lymphocyte costimulation	8/294	47/9263	0.00010016	0.00771021	0.00692646	GRAP2/CD81/CD28/CD5/TNFSF4/RAC1/CDC42/CSK	8
GO:0046633	alpha-beta T cell proliferation	6/294	25/9263	0.00010332	0.00778396	0.00699271	RASAL3/CD81/IL18/CD28/TNFSF4/ARG2	6
GO:0007159	leukocyte cell-cell adhesion	20/294	247/9263	0.00011181	0.0082481	0.00740967	CD6/RASAL3/CASP3/NLRP3/GRAP2/CD81/IL18/RC3H1/CD28/CD5/IL23R/HSPD1/TNFSF4/RAC1/ARG2/CDC42/ADAM8/CSK/GATA3/RARA	20
GO:0045622	regulation of T-helper cell differentiation	6/294	26/9263	0.00013077	0.00922661	0.00828871	NLRP3/IL18/RC3H1/IL23R/TNFSF4/RARA	6
GO:0002286	T cell activation involved in immune response	10/294	76/9263	0.00013302	0.00922661	0.00828871	FOXP1/NLRP3/CD81/IL18/RC3H1/BCL3/IL23R/TNFSF4/GATA3/RARA	10
GO:0043370	regulation of CD4-positive, alpha-beta T cell differentiation	7/294	37/9263	0.00013713	0.00922661	0.00828871	NLRP3/IL18/RC3H1/IL23R/TNFSF4/GATA3/RARA	7
GO:0002726	positive regulation of T cell cytokine production	5/294	17/9263	0.00014071	0.00922661	0.00828871	NLRP3/CD81/IL18/TNFSF4/GATA3	5
GO:0045624	positive regulation of T-helper cell differentiation	5/294	17/9263	0.00014071	0.00922661	0.00828871	NLRP3/IL18/IL23R/TNFSF4/RARA	5
GO:0046641	positive regulation of alpha-beta T cell proliferation	5/294	17/9263	0.00014071	0.00922661	0.00828871	RASAL3/CD81/IL18/CD28/TNFSF4	5
GO:0097190	apoptotic signaling pathway	29/294	440/9263	0.00014545	0.00936448	0.00841257	YWHAZ/TRADD/BCL2L12/CASP3/HSPA1B/GNAI2/XPA/HINT1/DDX3X/MPV17L/MAL/TNFSF12/CD28/RRM2B/CD5/CHCHD10/LAMP1/HSPA1A/SLC9A3R1/BCL3/TMC8/YWHAB/SKIL/ARRB2/JUN/PPP3CC/STK11/CDKN2D/IFI6	29
GO:0002456	T cell mediated immunity	10/294	77/9263	0.00014866	0.00939995	0.00844443	NLRP3/CD81/IL18/HLA-B/IL23R/HSPD1/TNFSF4/HLA-A/GATA3/WAS	10
GO:0046635	positive regulation of alpha-beta T cell activation	8/294	50/9263	0.00015745	0.00978149	0.00878719	RASAL3/NLRP3/CD81/IL18/CD28/IL23R/TNFSF4/RARA	8
GO:0032754	positive regulation of interleukin-5 production	4/294	9263-10-01	0.00017948	0.0107721	0.00967711	IL17RA/NLRP3/GATA3/RARA	4
GO:0045628	regulation of T-helper 2 cell differentiation	4/294	9263-10-01	0.00017948	0.0107721	0.00967711	NLRP3/IL18/TNFSF4/RARA	4
GO:0032753	positive regulation of interleukin-4 production	5/294	18/9263	0.0001898	0.0112012	0.0100625	NLRP3/CD28/TNFSF4/GATA3/RARA	5
GO:0002694	regulation of leukocyte activation	25/294	361/9263	0.00019874	0.0115367	0.010364	CD6/RASAL3/CASP3/NLRP3/GRAP2/CD81/IL18/RC3H1/CD28/FLT3LG/CD5/LAMP1/IL23R/HSPD1/TSPAN32/LAT/TNFSF4/RAC1/ARG2/CDC42/ADAM8/CSK/GATA3/RARA/EXOSC6	25
GO:0046632	alpha-beta T cell differentiation	10/294	80/9263	0.00020518	0.0116119	0.0104316	FOXP1/NLRP3/IL18/RC3H1/BCL3/IL23R/TCF7/TNFSF4/GATA3/RARA	10
GO:0002250	adaptive immune response	22/294	299/9263	0.0002066	0.0116119	0.0104316	CD6/NLRP3/CD81/IL18/RC3H1/LIME1/HLA-B/TAP2/CD28/BCL3/TXK/IL23R/HSPD1/LAT/TNFSF4/ARG2/CSK/HLA-A/GATA3/EXOSC6/TEC/WAS	22
GO:0001818	negative regulation of cytokine production	16/294	182/9263	0.00021414	0.0118478	0.0106435	PCBP2/HSF1/NLRP3/IRAK3/HDAC9/BCL3/IL23R/TMSB4X/TNFSF4/RAC1/ARG2/CSK/ARRB2/GATA3/RGCC/RARA	16
GO:2000516	positive regulation of CD4-positive, alpha-beta T cell activation	6/294	29/9263	0.00024901	0.0134837	0.0121131	NLRP3/CD81/IL18/IL23R/TNFSF4/RARA	6
GO:0098609	cell-cell adhesion	27/294	410/9263	0.00025132	0.0134837	0.0121131	CD6/RASAL3/CASP3/CD164/NLRP3/GRAP2/CD81/IL18/RC3H1/CD28/CD5/TNR/IL23R/ADAM19/HSPD1/TSPAN32/PCDH9/TNFSF4/RAC1/ARG2/CDC42/ADAM8/CSK/GATA3/RGCC/RARA/BLOC1S4	27
GO:1903311	regulation of mRNA metabolic process	20/294	266/9263	0.00030239	0.0159813	0.0143568	YWHAZ/HSF1/NUP98/HNRNPA0/RC3H1/YBX1/ELAVL1/HSPA1A/SFSWAP/SNRNP70/RBM17/SF3B4/ANP32A/U2AF2/CPSF7/YWHAB/KHSRP/ZBTB7A/PTBP1/EXOSC6	20
GO:0007264	small GTPase mediated signal transduction	24/294	350/9263	0.00030894	0.0160878	0.0144524	TNK2/RASAL3/GRAP2/SH3BP1/MAPKAP1/ABCA1/DOCK5/CFL1/SPRY1/STMN3/PSD4/DNMT1/GDI1/RAB11B/RAB2A/LAT/PLEKHG3/RAC1/TAGAP/CDC42/ARHGEF18/ARHGDIA/JUN/WAS	24
GO:0045197	establishment or maintenance of epithelial cell apical/basal polarity	5/294	20/9263	0.00032597	0.0165975	0.0149103	ANK1/SH3BP1/SLC9A3R1/MARK2/CDC42	5
GO:0002703	regulation of leukocyte mediated immunity	14/294	152/9263	0.00032811	0.0165975	0.0149103	NLRP3/CD81/IL18/HLA-B/CD28/LAMP1/IL23R/HSPD1/TNFSF4/HLA-A/ARRB2/GATA3/EXOSC6/WAS	14
GO:0051645	Golgi localization	4/294	9263-12-01	0.00040227	0.0196646	0.0176656	YWHAZ/SLC9A3R1/CDC42/STK11	4
GO:0002724	regulation of T cell cytokine production	5/294	21/9263	0.00041682	0.0196646	0.0176656	NLRP3/CD81/IL18/TNFSF4/GATA3	5
GO:0032673	regulation of interleukin-4 production	5/294	21/9263	0.00041682	0.0196646	0.0176656	NLRP3/CD28/TNFSF4/GATA3/RARA	5
GO:0035088	establishment or maintenance of apical/basal cell polarity	5/294	21/9263	0.00041682	0.0196646	0.0176656	ANK1/SH3BP1/SLC9A3R1/MARK2/CDC42	5
GO:0061245	establishment or maintenance of bipolar cell polarity	5/294	21/9263	0.00041682	0.0196646	0.0176656	ANK1/SH3BP1/SLC9A3R1/MARK2/CDC42	5
GO:0032655	regulation of interleukin-12 production	7/294	44/9263	0.00042206	0.0196646	0.0176656	FOXP1/IRAK3/LTB/IL23R/HSPD1/TNFSF4/ARRB2	7
GO:0032615	interleukin-12 production	7/294	45/9263	0.00048644	0.02237	0.0200961	FOXP1/IRAK3/LTB/IL23R/HSPD1/TNFSF4/ARRB2	7
GO:1902532	negative regulation of intracellular signal transduction	23/294	340/9263	0.00049896	0.0226515	0.0203489	BCL2L12/RASAL3/GNAI2/SESN1/NLRP3/IRAK3/DDX3X/SH3BP1/MAPKAP1/RRM2B/CRTC3/SPRY1/TAOK3/HSPA1A/STMN3/SLC9A3R1/TMSB4X/CSK/ARRB2/STK11/ITGB1BP1/CDKN2D/CALM3	23
GO:0008285	negative regulation of cell population proliferation	25/294	384/9263	0.00050608	0.0226838	0.020378	HSF1/MXD4/CASP3/HSPA1B/CD164/RC3H1/SPRY1/HSPA1A/SLC9A3R1/KLF13/TSPAN32/HPGDS/ARG2/CSK/DACH1/JUN/GATA3/SKI/RGCC/RARA/SF1/STK11/ITGB1BP1/CDKN2D/PTGDR2	25
GO:0050778	positive regulation of immune response	29/294	475/9263	0.00052503	0.0232391	0.0208768	FOXP1/NLRP3/GRAP2/CD81/IL18/RC3H1/LIME1/HLA-B/KRT1/CD28/LAMP1/TXK/PLCG2/IL23R/HSPD1/LAT/TNFSF4/RAC1/CDC42/ADAM8/CSK/HLA-A/GATA3/RGCC/RARA/EXOSC6/TEC/STK11/WAS	29
GO:0007265	Ras protein signal transduction	20/294	278/9263	0.00053512	0.0233933	0.0210153	RASAL3/GRAP2/MAPKAP1/ABCA1/CFL1/SPRY1/STMN3/PSD4/DNMT1/GDI1/RAB11B/RAB2A/LAT/PLEKHG3/RAC1/CDC42/ARHGEF18/ARHGDIA/JUN/WAS	20
GO:0032634	interleukin-5 production	4/294	13/9263	0.00056661	0.0241732	0.021716	IL17RA/NLRP3/GATA3/RARA	4
GO:0032674	regulation of interleukin-5 production	4/294	13/9263	0.00056661	0.0241732	0.021716	IL17RA/NLRP3/GATA3/RARA	4
GO:0010631	epithelial cell migration	14/294	161/9263	0.00058925	0.0245472	0.022052	EMC10/PFN1/FOXP1/SH3BP1/TNFSF12/DOCK5/HDAC9/TMSB4X/JUN/GATA3/RGCC/ITGB1BP1/GIPC1/CORO1B	14
GO:0090132	epithelium migration	14/294	161/9263	0.00058925	0.0245472	0.022052	EMC10/PFN1/FOXP1/SH3BP1/TNFSF12/DOCK5/HDAC9/TMSB4X/JUN/GATA3/RGCC/ITGB1BP1/GIPC1/CORO1B	14
GO:1901028	regulation of mitochondrial outer membrane permeabilization involved in apoptotic signaling pathway	6/294	34/9263	0.00061697	0.0254032	0.022821	YWHAZ/MPV17L/CHCHD10/HSPA1A/YWHAB/PPP3CC	6
GO:0090130	tissue migration	14/294	162/9263	0.00062695	0.0255177	0.0229238	EMC10/PFN1/FOXP1/SH3BP1/TNFSF12/DOCK5/HDAC9/TMSB4X/JUN/GATA3/RGCC/ITGB1BP1/GIPC1/CORO1B	14
GO:0035148	tube formation	9/294	76/9263	0.00063713	0.0256372	0.0230311	PFN1/CASP3/CFL1/LMO4/SEMA4C/GATA3/SKI/RARA/ITGB1BP1	9
GO:0043372	positive regulation of CD4-positive, alpha-beta T cell differentiation	5/294	23/9263	0.00065427	0.0260311	0.023385	NLRP3/IL18/IL23R/TNFSF4/RARA	5
GO:0002449	lymphocyte mediated immunity	15/294	182/9263	0.00066703	0.0262438	0.0235761	NLRP3/CD81/IL18/HLA-B/CD28/LAMP1/BCL3/IL23R/HSPD1/TNFSF4/HLA-A/ARRB2/GATA3/EXOSC6/WAS	15
GO:0008637	apoptotic mitochondrial changes	10/294	93/9263	0.0007006	0.0272618	0.0244906	YWHAZ/MPV17L/CHCHD10/HSPA1A/HSPD1/YWHAB/ARRB2/JUN/PPP3CC/IFI6	10
GO:0035743	CD4-positive, alpha-beta T cell cytokine production	4/294	14/9263	0.00077356	0.0294535	0.0264595	NLRP3/CD81/IL18/GATA3	4
GO:0071526	semaphorin-plexin signaling pathway	4/294	14/9263	0.00077356	0.0294535	0.0264595	SH3BP1/RAC1/ARHGDIA/SEMA4C	4
GO:0001667	ameboidal-type cell migration	16/294	205/9263	0.00080684	0.0303938	0.0273043	EMC10/PFN1/FOXP1/SH3BP1/TNFSF12/DOCK5/CFL1/HDAC9/TMSB4X/JUN/SEMA4C/GATA3/RGCC/ITGB1BP1/GIPC1/CORO1B	16
GO:0030010	establishment of cell polarity	9/294	79/9263	0.00084717	0.031577	0.0283672	SH3BP1/CFL1/SPRY1/SLC9A3R1/MARK2/CDC42/GATA3/STK11/FAM89B	9
GO:0032496	response to lipopolysaccharide	17/294	228/9263	0.00093407	0.0341391	0.0306688	JUNB/HSF1/CD6/FOXP1/CASP3/NFKBIB/NLRP3/HNRNPA0/IL18/IRAK3/ABCA1/PLCG2/IL23R/TNFSF4/JUN/PLSCR3/RARA	17
GO:0046637	regulation of alpha-beta T cell differentiation	7/294	50/9263	0.00093519	0.0341391	0.0306688	NLRP3/IL18/RC3H1/IL23R/TNFSF4/GATA3/RARA	7
GO:2001233	regulation of apoptotic signaling pathway	20/294	291/9263	0.00094953	0.0343091	0.0308216	YWHAZ/TRADD/BCL2L12/HSPA1B/GNAI2/DDX3X/MPV17L/MAL/TNFSF12/RRM2B/CHCHD10/HSPA1A/SLC9A3R1/TMC8/YWHAB/SKIL/ARRB2/PPP3CC/CDKN2D/IFI6	20
GO:0043542	endothelial cell migration	11/294	114/9263	0.00096189	0.0344045	0.0309072	EMC10/FOXP1/SH3BP1/TNFSF12/HDAC9/TMSB4X/GATA3/RGCC/ITGB1BP1/GIPC1/CORO1B	11
GO:0032233	positive regulation of actin filament bundle assembly	6/294	37/9263	0.00098464	0.034521	0.0310119	PFN1/SORBS3/RAC1/CDC42/RGCC/ITGB1BP1	6
GO:0032720	negative regulation of tumor necrosis factor production	6/294	37/9263	0.00098464	0.034521	0.0310119	HSF1/IRAK3/BCL3/ARG2/ARRB2/RARA	6
GO:0051492	regulation of stress fiber assembly	7/294	51/9263	0.00105506	0.0366271	0.0329039	PFN1/SORBS3/RAC1/CDC42/RGCC/ITGB1BP1/WAS	7
GO:0001838	embryonic epithelial tube formation	8/294	66/9263	0.00108608	0.0373378	0.0335424	PFN1/CASP3/CFL1/LMO4/SEMA4C/GATA3/SKI/RARA	8
GO:0042692	muscle cell differentiation	13/294	153/9263	0.0011388	0.0384807	0.0345691	CASP3/MORF4L2/CD81/FLT3LG/HDAC9/DNMT1/G6PD/PTBP1/CDC42/ARRB2/SEMA4C/SKI/RARA	13
GO:0002697	regulation of immune effector process	19/294	274/9263	0.00114105	0.0384807	0.0345691	PCBP2/NLRP3/CD81/IL18/RC3H1/IRAK3/HLA-B/CD28/LAMP1/IL23R/HSPD1/TSPAN32/TNFSF4/HLA-A/ARRB2/GATA3/RARA/EXOSC6/WAS	19
GO:0032633	interleukin-4 production	5/294	26/9263	0.00118306	0.0391976	0.0352131	NLRP3/CD28/TNFSF4/GATA3/RARA	5
GO:0001819	positive regulation of cytokine production	21/294	318/9263	0.00118445	0.0391976	0.0352131	CD6/HSPA1B/IL17RA/NLRP3/CD81/IL18/DDX3X/LTB/CD28/HSPA1A/BCL3/TXK/PLCG2/IFNGR1/IL23R/HSPD1/TNFSF4/ADAM8/GATA3/RGCC/RARA	21
GO:0072175	epithelial tube formation	8/294	67/9263	0.00120007	0.0393469	0.0353472	PFN1/CASP3/CFL1/LMO4/SEMA4C/GATA3/SKI/RARA	8
GO:1903556	negative regulation of tumor necrosis factor superfamily cytokine production	6/294	39/9263	0.00131033	0.0422181	0.0379265	HSF1/IRAK3/BCL3/ARG2/ARRB2/RARA	6
GO:0016331	morphogenesis of embryonic epithelium	8/294	68/9263	0.00132341	0.0422181	0.0379265	PFN1/CASP3/CFL1/LMO4/SEMA4C/GATA3/SKI/RARA	8
GO:0032649	regulation of interferon-gamma production	8/294	68/9263	0.00132341	0.0422181	0.0379265	IL18/BCL3/TXK/IL23R/HSPD1/TNFSF4/GATA3/RARA	8
GO:0002237	response to molecule of bacterial origin	17/294	236/9263	0.00136499	0.0431557	0.0387689	JUNB/HSF1/CD6/FOXP1/CASP3/NFKBIB/NLRP3/HNRNPA0/IL18/IRAK3/ABCA1/PLCG2/IL23R/TNFSF4/JUN/PLSCR3/RARA	17
GO:0051347	positive regulation of transferase activity	25/294	412/9263	0.00138916	0.043531	0.0391061	GADD45A/GADD45G/CD81/IL18/UBE2S/DDX3X/MAPKAP1/TAOK3/DGKZ/JTB/MARK2/RPS2/LMO4/PFKFB2/IL23R/LAT/TMSB4X/AXIN1/SERINC5/ADAM8/CSK/RGCC/STK11/ITGB1BP1/CALM3	25
GO:0002369	T cell cytokine production	5/294	27/9263	0.00141474	0.0435617	0.0391336	NLRP3/CD81/IL18/TNFSF4/GATA3	5
GO:0033120	positive regulation of RNA splicing	5/294	27/9263	0.00141474	0.0435617	0.0391336	NUP98/HSPA1A/SNRNP70/SF3B4/U2AF2	5
GO:0030098	lymphocyte differentiation	18/294	258/9263	0.0014296	0.0436397	0.0392036	FOXP1/NLRP3/IL18/RC3H1/IRF2BP2/CD28/FLT3LG/HDAC9/BCL3/PLCG2/IL23R/TCF7/TNFSF4/ZBTB7A/ADAM8/GATA3/RARA/STK11	18
GO:0042129	regulation of T cell proliferation	10/294	103/9263	0.00154901	0.0468235	0.0420638	CD6/RASAL3/CASP3/CD81/IL18/RC3H1/CD28/IL23R/TNFSF4/ARG2	10
GO:0010634	positive regulation of epithelial cell migration	9/294	86/9263	0.00156034	0.0468235	0.0420638	EMC10/PFN1/FOXP1/DOCK5/HDAC9/TMSB4X/JUN/GATA3/ITGB1BP1	9
GO:0002699	positive regulation of immune effector process	13/294	159/9263	0.0016179	0.0481427	0.043249	NLRP3/CD81/IL18/HLA-B/CD28/LAMP1/IL23R/HSPD1/TNFSF4/HLA-A/GATA3/RARA/EXOSC6	13
GO:0110020	regulation of actomyosin structure organization	7/294	55/9263	0.00166	0.0489839	0.0440046	PFN1/SORBS3/RAC1/CDC42/RGCC/ITGB1BP1/WAS	7
GO:0007163	establishment or maintenance of cell polarity	11/294	122/9263	0.00167725	0.0490839	0.0440945	ANK1/SH3BP1/MAPKAP1/CFL1/SPRY1/SLC9A3R1/MARK2/CDC42/GATA3/STK11/FAM89B	11
GO:0032816	positive regulation of natural killer cell activation	4/294	17/9263	0.00170588	0.0495125	0.0444795	IL18/FLT3LG/LAMP1/IL23R	4
